# Supplementary material for: DNA Barcoding of Lepidoptera Species from the Maltese Islands: New and Additional Records, with an Insight into Endemic Diversity
Source: MDPI journal article supplement (doi:10.3390/d14121090), 2022-12-09
Supplement: s1 [file s1]

**Table S1.** A list of the species analysed (<sup>F</sup> first records for Malta; <sup>E</sup> endemic species), including the number of specimens per species (n), haplotypic variants per species (H), the mean percentage distance within species (AvD), the maximum percentage distance within species (MxD), the accession numbers, the percentage similarity to the closest BOLD match (matches < 100% indicate that the haplotypic variant was recorded for the first time).

| FAMILY<br>Species                                      | n | H | AvD<br>(%) | MxD<br>(%) | Accession<br>numbers | Closest BOLD<br>match (%) |
|--------------------------------------------------------|---|---|------------|------------|----------------------|---------------------------|
| <b>AUTOSTICHIDAE</b>                                   |   |   |            |            |                      |                           |
| <i>Apatema baixerasi</i> Vives, 2001 <sup>F</sup>      | 1 | 1 | -          | -          | MW305784             | 99.3                      |
| <b>BLASTOBASIDAE</b>                                   |   |   |            |            |                      |                           |
| <i>Blastobasisphycidella</i> (Zeller, 1839)            | 3 | 1 | 0.00       | 0.00       | MF059269             | 98.3                      |
|                                                        |   | 1 |            |            | MW305794             | 98.3                      |
|                                                        |   | 1 |            |            | MW305795             | 98.3                      |
| <b>COSMOPTERIGIDAE</b>                                 |   |   |            |            |                      |                           |
| <i>Bifascioides leucomelanella</i> (Rebel, 1916)       | 1 | 1 | -          | -          | MW305793             | 99.8                      |
| <i>Pyroderces argyrogrammos</i> (Zeller, 1847)         | 3 | 1 | 0.42       | 0.63       | KX399352             | 99.3                      |
|                                                        |   | 2 |            |            | KX399354             | 99.3                      |
|                                                        |   | 3 |            |            | MF059253             | 99.7                      |
| <b>COSSIDAE</b>                                        |   |   |            |            |                      |                           |
| <i>Zeuzera pyrina</i> (Linnaeus, 1761)                 | 2 | 1 | 0.00       | 0.00       | MW306041             | 97.9                      |
|                                                        |   | 1 |            |            | MW306040             | 97.9                      |
| <b>CRAMBIDAE</b>                                       |   |   |            |            |                      |                           |
| <i>Agriphila trabeatellus</i> (Herrich-Schäffer, 1848) | 2 | 1 | 0.41       | 0.41       | MF059244             | 99.7                      |
|                                                        |   | 2 |            |            | MW305751             | 99.7                      |
| <i>Ancylolomia pectinatellus</i> (Zeller, 1847)        | 1 | 1 | -          | -          | MW305780             | 99.9                      |
| <i>Antigastra cataaunalis</i> (Duponchel, 1833)        | 3 | 1 | 0.45       | 0.67       | MW305781             | 99.9                      |
|                                                        |   | 2 |            |            | MW305782             | 100                       |
|                                                        |   | 3 |            |            | MW305783             | 99.9                      |
| <i>Aporodes floralis</i> (Hübner, 1809)                | 3 | 1 | 0.00       | 0.00       | KX399382             | 100                       |
|                                                        |   | 1 |            |            | MW305787             | 100                       |
|                                                        |   | 1 |            |            | MW305788             | 100                       |
| <i>Dolicharthria bruguieralis</i> (Duponchel, 1833)    | 1 | 1 | -          | -          | MF059250             | 99.9                      |
| <i>Duponchelia fovealis</i> Zeller, 1847               | 5 | 1 | 0.12       | 0.30       | MF059251             | 99.9                      |
|                                                        |   | 2 |            |            | MF059252             | 100                       |
|                                                        |   | 3 |            |            | MW305844             | 99.9                      |
|                                                        |   | 2 |            |            | MW305845             | 100                       |
|                                                        |   | 2 |            |            | MW305846             | 100                       |
| <i>Euchromius cambridgei</i> (Zeller, 1867)            | 4 | 1 | 0.45       | 0.67       | MW305860             | 99.2                      |
|                                                        |   | 2 |            |            | MW305861             | 99.2                      |
|                                                        |   | 1 |            |            | MW305862             | 99.2                      |
|                                                        |   | 2 |            |            | MW305863             | 99.2                      |
| <i>Euchromius ocella</i> (Haworth, 1811)               | 8 | 1 | 0.28       | 0.81       | MF059259             | 100                       |
|                                                        |   | 2 |            |            | MF059260             | 99.9                      |
|                                                        |   | 1 |            |            | MW305864             | 100                       |
|                                                        |   | 3 |            |            | MW305865             | 100                       |
|                                                        |   | 3 |            |            | MW305866             | 100                       |
|                                                        |   | 4 |            |            | MW305867             | 99.5                      |
|                                                        |   | 2 |            |            | MW305868             | 99.9                      |
|                                                        |   | 1 |            |            | MW305869             | 100                       |
| <i>Evergestis</i> sp.                                  | 2 | 1 | 0.15       | 0.15       | MW305875             | 97.1                      |
|                                                        |   | 2 |            |            | MW305876             | 97.2                      |
| <i>Hellula undalis</i> (Fabricius, 1781)               | 5 | 1 | 0.49       | 0.91       | MW305885             | 100                       |
|                                                        |   | 2 |            |            | MW305886             | 100                       |
|                                                        |   | 3 |            |            | MW305887             | 100                       |
|                                                        |   | 4 |            |            | MW305888             | 99.9                      |

|                                                           |    |   |      |      |          |      |
|-----------------------------------------------------------|----|---|------|------|----------|------|
|                                                           |    | 2 |      |      | MW305889 | 100  |
| <i>Herpetogramma licarsisalis</i> (Walker, 1859)          | 1  | 1 | -    | -    | MW305890 | 99.8 |
| <i>Nomophila noctuella</i> (Denis & Schiffermuller, 1775) | 3  | 1 | 0.00 | 0.00 | KX399350 | 100  |
|                                                           |    | 1 |      |      | MW305942 | 100  |
|                                                           |    | 1 |      |      | MW305943 | 100  |
| <i>Palpita vitrealis</i> (Rossi, 1794)                    | 1  | 1 | -    | -    | MW305953 | 100  |
| <i>Spoladea recurvalis</i> (Fabricius, 1775)              | 1  | 1 | -    | -    | MF059265 | 100  |
| <i>Udea ferrugalis</i> (Hübner, 1796)                     | 3  | 1 | 0.09 | 0.14 | MW306027 | 100  |
|                                                           |    | 1 |      |      | MW306028 | 100  |
|                                                           |    | 2 |      |      | MW306029 | 100  |
| <i>Uresiphita gilvata</i> (Fabricius, 1794)               | 1  | 1 | -    |      | MW306030 | 100  |
| <b>EREBIDAE</b>                                           |    |   |      |      |          |      |
| <i>Clytie illunaris</i> (Hübner, 1813)                    | 1  | 1 | -    | -    | MW305831 | 99.9 |
| <i>Cymbalophora pudica</i> (Esper, 1785)                  | 3  | 1 | 0.26 | 0.44 | KX399376 | 99.0 |
|                                                           |    | 1 |      |      | MF059274 | 99.0 |
|                                                           |    | 2 |      |      | MW305842 | 98.9 |
| <i>Dysauxes famula</i> (Freyer, 1836)                     | 2  | 1 | 0.36 | 0.36 | KX399351 | 99.6 |
|                                                           |    | 2 |      |      | MF059273 | 100  |
| <i>Eilema caniola</i> (Hübner, 1808)                      | 2  | 1 | 0.00 | 0.00 | MW305847 | 100  |
|                                                           |    | 1 |      |      | MW305848 | 100  |
| <i>Eublemma ostrina</i> (Hübner, 1808)                    | 1  | 1 | -    | -    | MW305852 | 100  |
| <i>Eublemma parva</i> (Hübner, 1808)                      | 5  | 1 | 0.23 | 0.33 | MW305853 | 99.8 |
|                                                           |    | 2 |      |      | MW305854 | 100  |
|                                                           |    | 3 |      |      | MW305855 | 100  |
|                                                           |    | 3 |      |      | MW305856 | 100  |
|                                                           |    | 3 |      |      | MW305857 | 100  |
| <i>Eublemma scitula</i> Rambur, 1833                      | 1  | 1 | -    | -    | MW305858 | 99.9 |
| <i>Eublemma</i> sp.                                       | 1  | 1 | -    | -    | MW305859 | 99.9 |
| <i>Hypena lividalis</i> (Hübner, 1796)                    | 3  | 1 | 0.24 | 0.38 | MF059271 | 100  |
|                                                           |    | 2 |      |      | MW305893 | 100  |
|                                                           |    | 1 |      |      | MW305894 | 100  |
| <i>Hypena obsitalis</i> (Hübner, 1813)                    | 10 | 1 | 0.14 | 0.39 | MW305895 | 100  |
|                                                           |    | 1 |      |      | MW305896 | 100  |
|                                                           |    | 2 |      |      | MW305897 | 99.8 |
|                                                           |    | 3 |      |      | MW305898 | 99.9 |
|                                                           |    | 4 |      |      | MW305899 | 99.8 |
|                                                           |    | 1 |      |      | MW305900 | 100  |
|                                                           |    | 1 |      |      | MW305901 | 100  |
|                                                           |    | 5 |      |      | MW305902 | 100  |
|                                                           |    | 1 |      |      | MW305903 | 100  |
|                                                           |    | 1 |      |      | MW305904 | 100  |
| <i>Metachrostis velocior</i> (Staudinger, 1892)           | 3  | 1 | 0.12 | 0.18 | MW305933 | 99.8 |
|                                                           |    | 2 |      |      | MW305934 | 100  |
|                                                           |    | 2 |      |      | MW305935 | 100  |
| <i>Metachrostis velox</i> (Hübner, 1813)                  | 2  | 1 | 0.57 | 0.57 | MW305936 | 100  |
|                                                           |    | 2 |      |      | MW305937 | 99.7 |
| <i>Nodaria nodosalis</i> (Herrich-Schäffer, 1851)         | 1  | 1 | -    | -    | MF059275 | 100  |
| <i>Ophiusa tirhaca</i> (Cramer, 1773)                     | 1  | 1 | -    | -    | MW305950 | 100  |
| <i>Orgyia trigotephras</i> Boisduval, 1829                | 1  | 1 | -    | -    | MW305951 | 99.1 |
| <i>Pechipogo plumigeralis</i> Hübner, 1825                | 1  | 1 | -    | -    | MW305957 | 100  |
| <i>Phragmatobia fuliginosa</i> (Linnaeus, 1758)           | 4  | 1 | 0.00 | 0.00 | MW305966 | 100  |
|                                                           |    | 1 |      |      | MW305967 | 100  |
|                                                           |    | 1 |      |      | MW305968 | 100  |
|                                                           |    | 1 |      |      | MW305969 | 100  |
| <i>Utetheisa pulchella</i> (Linnaeus, 1758)               | 1  | 1 | -    | -    | MW306031 | 100  |
| <i>Zebeeba falsalis</i> (Herrich-Schäffer, 1839)          | 6  | 1 | 0.00 | 0.00 | MF059266 | 100  |
|                                                           |    | 1 |      |      | MW306035 | 100  |
|                                                           |    | 1 |      |      | MW306036 | 100  |
|                                                           |    | 1 |      |      | MW306037 | 100  |
|                                                           |    | 1 |      |      | MW306038 | 100  |
|                                                           |    | 1 |      |      | MW306039 | 100  |

|                                                              |   |   |      |      |          |      |
|--------------------------------------------------------------|---|---|------|------|----------|------|
| <b>GELECHIIDAE</b>                                           |   |   |      |      |          |      |
| <i>Agonopterix olusatri</i> Corley & Buchner, 2019           | 1 | 1 | -    | -    | MW305749 | 99.4 |
| <i>Agonopterix subpropinquella</i> (Stainton, 1849)          | 1 | 1 | -    | -    | MW305750 | 98.0 |
| <i>Aproaerema</i> sp.                                        | 1 | 1 | -    | -    | MW305789 | 95.3 |
| <i>Ornativelva plutelliformis</i> (Staudinger, 1859)         | 1 | 1 | -    | -    | MW305952 | 98.9 |
| <i>Phthorimaea operculella</i> (Zeller, 1873)                | 4 | 1 | 0.00 | 0.00 | KX399353 | 100  |
|                                                              |   | 1 |      |      | MW305970 | 100  |
|                                                              |   | 1 |      |      | MW305971 | 100  |
|                                                              |   | 1 |      |      | MW305972 | 100  |
| <i>Platyedra subcinerea</i> (Haworth, 1828)                  | 6 | 1 | 0.52 | 0.97 | MW305976 | 100  |
|                                                              |   | 2 |      |      | MW305977 | 99.8 |
|                                                              |   | 3 |      |      | MW305978 | 99.6 |
|                                                              |   | 4 |      |      | MW305979 | 99.5 |
|                                                              |   | 5 |      |      | MW305980 | 99.8 |
|                                                              |   | 1 |      |      | MW305981 | 100  |
| <i>Ptocheuusa paupella</i> (Zeller, 1847)                    | 1 | 1 | -    | -    | MW305998 | 100  |
| <i>Tuta absoluta</i> (Meyrick, 1917)                         | 1 | 1 | -    | -    | MW306021 | 100  |
| <b>GEOMETRIDAE</b>                                           |   |   |      |      |          |      |
| <i>Charissa variegata</i> (Duponchel, 1830)                  | 5 | 1 | 0.90 | 1.83 | MF059270 | 99.9 |
|                                                              |   | 1 |      |      | MW305823 | 99.9 |
|                                                              |   | 2 |      |      | MW305824 | 99.8 |
|                                                              |   | 3 |      |      | MW305825 | 99.5 |
|                                                              |   | 4 |      |      | MW305826 | 99.3 |
| <i>Cyclophora puppillaria</i> (Hübner, 1799)                 | 1 | 1 | -    | -    | MW305841 | 100  |
| <i>Epirrhoe alternata</i> (Müller, 1764)                     | 2 | 1 | 0.00 | 0.00 | MF059267 | 100  |
|                                                              |   | 1 |      |      | MW305851 | 100  |
| <i>Eucrostes indigenata</i> (de Villers, 1789)               | 2 | 1 | 0.19 | 0.19 | MW305871 | 99.8 |
|                                                              |   | 2 |      |      | MW305872 | 99.6 |
| <i>Eupithecia centaureata</i> (Denis & Schiffermuller, 1775) | 2 | 1 | 1.01 | 1.01 | MW305873 | 99.7 |
|                                                              |   | 2 |      |      | MW305874 | 98.9 |
| <i>Gymnoscelis rufifasciata</i> (Haworth, 1809)              | 1 | 1 | -    | -    | MW305878 | 99.8 |
| <i>Idaea elongaria</i> (Rambur, 1833)                        | 1 | 1 | -    | -    | KX399370 | 99.8 |
| <i>Idaea fractilineata</i> (Zeller, 1847)                    | 4 | 1 | 0.39 | 0.67 | KX399369 | 99.8 |
|                                                              |   | 2 |      |      | MW305905 | 99.5 |
|                                                              |   | 3 |      |      | MW305906 | 100  |
|                                                              |   | 3 |      |      | MW305907 | 100  |
| <i>Idaea obsoletaria</i> (Rambur, 1833)                      | 1 | 1 | -    | -    | MW305908 | 99.7 |
| <i>Idaea seriata</i> (Schränk, 1802)                         | 3 | 1 | 0.00 | 0.00 | KX399346 | 99.8 |
|                                                              |   | 1 |      |      | MW305909 | 99.8 |
|                                                              |   | 1 |      |      | MW305910 | 99.8 |
| <i>Isturgia pulinda</i> (Walker, 1860)                       | 1 | 1 | -    | -    | MW305911 | 100  |
| <i>Menophra japygiaria</i> (Costa, 1849)                     | 5 | 1 | 0.00 | 0.00 | MW305927 | 100  |
|                                                              |   | 1 |      |      | MW305928 | 100  |
|                                                              |   | 1 |      |      | MW305929 | 100  |
|                                                              |   | 1 |      |      | MW305930 | 100  |
|                                                              |   | 1 |      |      | MW305931 | 100  |
| <i>Phaiogramma etruscaria</i> (Zeller, 1849)                 | 1 | 1 | -    | -    | MW305961 | 100  |
| <i>Phaiogramma faustinata</i> (Milliere, 1868)               | 1 | 1 | -    | -    | MW305962 | 100  |
| <i>Rhodometra sacraria</i> (Linnaeus, 1767)                  | 6 | 1 | 0.14 | 0.44 | KX399377 | 100  |
|                                                              |   | 1 |      |      | MF059262 | 100  |
|                                                              |   | 1 |      |      | MF059263 | 100  |
|                                                              |   | 2 |      |      | MF059264 | 99.9 |
|                                                              |   | 1 |      |      | MW306000 | 100  |
|                                                              |   | 3 |      |      | MW306001 | 100  |
| <i>Scopula imitaria</i> (Hübner, 1799)                       | 2 | 1 | 0.00 | 0.00 | MF059268 | 100  |
|                                                              |   | 1 |      |      | MW306002 | 100  |
| <i>Scopula minorata</i> (Boisduval, 1833)                    | 1 | 1 | -    | -    | KX399359 | 99.8 |
| <i>Xanthorhoe disjunctaria</i> (de La Harpe, 1860)           | 1 | 1 | -    | -    | MW306034 | 100  |
| <b>LASIOCAMPIDAE</b>                                         |   |   |      |      |          |      |
| <i>Gastropacha quercifolia</i> (Linnaeus, 1758)              | 1 | 1 | -    | -    | MW305877 | 99.7 |

|                                                       |    |   |      |      |          |      |
|-------------------------------------------------------|----|---|------|------|----------|------|
| <i>Lasiocampa</i> sp.                                 | 5  | 1 | 0.22 | 0.44 | KX399345 | 97.9 |
|                                                       |    | 2 |      |      | KX399374 | 98.2 |
|                                                       |    | 3 |      |      | MW305915 | 98.2 |
|                                                       |    | 3 |      |      | MW305916 | 98.2 |
|                                                       |    | 3 |      |      | MW305917 | 98.2 |
| <b>LYCAENIDAE</b>                                     |    |   |      |      |          |      |
| <i>Polyommatus celina</i> (Austaut, 1879)             | 4  | 1 | 0.33 | 0.44 | MW305986 | 100  |
|                                                       |    | 1 |      |      | MW305987 | 100  |
|                                                       |    | 2 |      |      | MW305988 | 99.9 |
|                                                       |    | 3 |      |      | MW305989 | 100  |
| <b>MOMPHIDAE</b>                                      |    |   |      |      |          |      |
| <i>Mompha subbistrigella</i> (Haworth, 1828)          | 1  | 1 | -    | -    | KX399364 | 99.8 |
| <b>NOCTUIDAE</b>                                      |    |   |      |      |          |      |
| <i>Acontia lucida</i> (Hufnagel, 1766)                | 3  | 1 | 0.33 | 0.50 | MF059276 | 99.9 |
|                                                       |    | 2 |      |      | MW305744 | 100  |
|                                                       |    | 1 |      |      | MW305745 | 99.9 |
| <i>Agrotis biconica</i> (Hübner, 1808)                | 1  | 1 | -    | -    | MW305753 | 100  |
| <i>Agrotis ipsilon</i> (Hufnagel, 1766)               | 3  | 1 | 0.19 | 0.29 | MW305754 | 100  |
|                                                       |    | 2 |      |      | MW305755 | 100  |
|                                                       |    | 2 |      |      | MW305756 | 100  |
| <i>Agrotis lata</i> Treitschke, 1835                  | 4  | 1 | 0.39 | 0.66 | KX399375 | 99.6 |
|                                                       |    | 2 |      |      | MW305757 | 99.8 |
|                                                       |    | 3 |      |      | MW305758 | 100  |
|                                                       |    | 4 |      |      | MW305759 | 100  |
| <i>Agrotis puta</i> (Hübner, 1803)                    | 5  | 1 | 0.00 | 0.00 | MW305760 | 100  |
|                                                       |    | 1 |      |      | MW305761 | 100  |
|                                                       |    | 1 |      |      | MW305762 | 100  |
|                                                       |    | 1 |      |      | MW305763 | 100  |
|                                                       |    | 1 |      |      | MW305764 | 100  |
| <i>Agrotis segetum</i> (Denis & Schiffermuller, 1775) | 3  | 1 | 0.41 | 0.62 | MF059277 | 99.9 |
|                                                       |    | 1 |      |      | MW305765 | 99.9 |
|                                                       |    | 2 |      |      | MW305766 | 100  |
| <i>Agrotis trux</i> (Hübner, 1824)                    | 14 | 1 | 0.24 | 0.50 | KX399373 | 99.5 |
|                                                       |    | 2 |      |      | MW305767 | 99.7 |
|                                                       |    | 3 |      |      | MW305768 | 99.7 |
|                                                       |    | 3 |      |      | MW305769 | 99.7 |
|                                                       |    | 4 |      |      | MW305770 | 99.7 |
|                                                       |    | 2 |      |      | MW305771 | 99.7 |
|                                                       |    | 3 |      |      | MW305772 | 99.7 |
|                                                       |    | 5 |      |      | MW305773 | 99.7 |
|                                                       |    | 3 |      |      | MW305774 | 99.7 |
|                                                       |    | 2 |      |      | MW305775 | 99.5 |
|                                                       |    | 6 |      |      | MW305776 | 99.7 |
|                                                       |    | 3 |      |      | MW305777 | 99.7 |
|                                                       |    | 4 |      |      | MW305778 | 99.7 |
|                                                       |    | 2 |      |      | MW305779 | 99.7 |
| <i>Anarta trifolii</i> (Hufnagel, 1766)               | 1  | 1 | -    | -    | MW305880 | 100  |
| <i>Autographa gamma</i> (Linnaeus, 1758)              | 3  | 1 | 0.29 | 0.43 | MW305790 | 100  |
|                                                       |    | 1 |      |      | MW305791 | 99.8 |
|                                                       |    | 2 |      |      | MW305792 | 99.8 |
| <i>Callopistria latreillei</i> (Duponchel, 1827)      | 1  | 1 | -    | -    | MW305811 | 99.5 |
| <i>Caradrina clavipalpis</i> (Scopoli, 1763)          | 3  | 1 | 0.00 | 0.00 | MW305812 | 100  |
|                                                       |    | 1 |      |      | MW305813 | 100  |
|                                                       |    | 1 |      |      | MW305814 | 100  |
| <i>Caradrina flava</i> Oberthur, 1876                 | 2  | 1 | 0.00 | 0.00 | MW305815 | 100  |
|                                                       |    | 1 |      |      | MW305816 | 100  |
| <i>Caradrina flavirena</i> Guenee, 1852               | 6  | 1 | 0.00 | 0.00 | MF059278 | 100  |
|                                                       |    | 1 |      |      | MW305817 | 100  |

|                                                                        |   |   |      |      |          |      |
|------------------------------------------------------------------------|---|---|------|------|----------|------|
|                                                                        |   | 1 |      |      | MW305818 | 100  |
|                                                                        |   | 1 |      |      | MW305819 | 100  |
|                                                                        |   | 1 |      |      | MW305820 | 100  |
|                                                                        |   | 1 |      |      | MW305821 | 100  |
| <i>Chrysodeixis chalcites</i> (Esper, 1789)                            | 3 | 1 | 0.00 | 0.00 | MW305827 | 100  |
|                                                                        |   | 1 |      |      | MW305828 | 100  |
|                                                                        |   | 1 |      |      | MW305829 | 100  |
| <i>Condica viscosa</i> (Freyer, 1831)                                  | 1 | 1 | -    | -    | MW305835 | 100  |
| <i>Cryphia algae</i> (Fabricius, 1775)                                 | 5 | 1 | 0.07 | 0.17 | MW305836 | 99.7 |
|                                                                        |   | 2 |      |      | MW305837 | 99.9 |
|                                                                        |   | 2 |      |      | MW305838 | 99.9 |
|                                                                        |   | 2 |      |      | MW305839 | 99.9 |
|                                                                        |   | 2 |      |      | MW305840 | 99.9 |
| <i>Hadena sancta</i> (Hübner, 1822)                                    | 2 | 1 | -    | -    | MF059279 | 99.4 |
|                                                                        |   | 1 |      |      | MW305879 | 99.4 |
| <i>Heliothis peltigera</i> (Denis & Schiffermuller, 1775)              | 5 | 1 | 0.14 | 0.29 | KX399379 | 100  |
|                                                                        |   | 2 |      |      | MW305881 | 100  |
|                                                                        |   | 3 |      |      | MW305882 | 100  |
|                                                                        |   | 2 |      |      | MW305883 | 100  |
|                                                                        |   | 2 |      |      | MW305884 | 100  |
| <i>Leucania putrescens vallettai</i> Boursin, 1952 <sup>E</sup>        | 2 | 1 | 0.33 | 0.33 | MW305925 | 97.8 |
|                                                                        |   | 2 |      |      | MW305926 | 97.8 |
| <i>Mythimna sicula</i> (Treitschke, 1835)                              | 1 | 1 | -    | -    | KX399367 | 99.8 |
| <i>Mythimna unipuncta</i> (Haworth, 1809)                              | 1 | 1 | -    | -    | MW305938 | 100  |
| <i>Noctua pronuba</i> (Linnaeus, 1758)                                 | 2 | 1 | 0.33 | 0.33 | MW305940 | 100  |
|                                                                        |   | 2 |      |      | MW305941 | 100  |
| <i>Nyctobrya segunai</i> Fibiger, Steiner, & Ronkay, 2009 <sup>E</sup> | 4 | 1 | 0.53 | 0.68 | MW305944 | 98.2 |
|                                                                        |   | 2 |      |      | MW305945 | 98.2 |
|                                                                        |   | 3 |      |      | MW305946 | 98.3 |
|                                                                        |   | 4 |      |      | MW305947 | 98.2 |
| <i>Pseudozarba bipartita</i> (Herrich-Schäffer, 1850)                  | 6 | 1 | 0.48 | 1.16 | KX399368 | 99.8 |
|                                                                        |   | 2 |      |      | MW305991 | 99.4 |
|                                                                        |   | 3 |      |      | MW305992 | 99.5 |
|                                                                        |   | 4 |      |      | MW305993 | 99.4 |
|                                                                        |   | 5 |      |      | MW305994 | 99.2 |
|                                                                        |   | 6 |      |      | MW305995 | 99.7 |
| <i>Spodoptera cilium</i> Guenee, 1852                                  | 1 | 1 | -    | -    | MW306004 | 100  |
| <i>Spodoptera exigua</i> (Hübner, 1808)                                | 8 | 1 | 0.28 | 0.66 | MW306005 | 100  |
|                                                                        |   | 2 |      |      | MW306006 | 99.6 |
|                                                                        |   | 1 |      |      | MW306007 | 100  |
|                                                                        |   | 1 |      |      | MW306008 | 100  |
|                                                                        |   | 3 |      |      | MW306009 | 100  |
|                                                                        |   | 3 |      |      | MW306010 | 100  |
|                                                                        |   | 3 |      |      | MW306011 | 100  |
|                                                                        |   | 1 |      |      | MW306012 | 100  |
| <i>Synthymia fixa</i> (Fabricius, 1787)                                | 3 | 1 | 0.00 | 0.00 | MW306017 | 100  |
|                                                                        |   | 1 |      |      | MW306018 | 100  |
|                                                                        |   | 1 |      |      | MW306019 | 100  |
| <i>Trichoplusia ni</i> (Hübner, 1803)                                  | 1 | 1 | -    | -    | MF059272 | 100  |
| <i>Tyta luctuosa</i> (Denis & Schiffermuller, 1775)                    | 5 | 1 | 0.07 | 0.22 | MW306022 | 100  |
|                                                                        |   | 1 |      |      | MW306023 | 100  |
|                                                                        |   | 1 |      |      | MW306024 | 100  |
|                                                                        |   | 2 |      |      | MW306025 | 100  |
|                                                                        |   | 1 |      |      | MW306026 | 100  |
| <i>Xylena exsoleta</i> (Linnaeus, 1758)                                | 1 | 1 | -    |      | KX399380 | 99.6 |
| <b>NYMPHALIDAE</b>                                                     |   |   |      |      |          |      |
| <i>Coenonympha pamphilus</i> (Linnaeus, 1758)                          | 1 | 1 | -    | -    | MW305832 | 100  |
| <i>Danaus chrysippus</i> (Linnaeus, 1758)                              | 1 | 1 | -    | -    | MW305843 | 100  |
| <i>Lasiommata megera</i> (Linnaeus, 1767)                              | 1 | 1 | -    | -    | MW305918 | 100  |
| <i>Vanessa atalanta</i> (Linnaeus, 1758)                               | 2 | 1 | 0.14 | 0.14 | MW306032 | 100  |
|                                                                        |   | 2 |      |      | MW306033 | 100  |

|                                                            |   |   |      |      |          |      |  |
|------------------------------------------------------------|---|---|------|------|----------|------|--|
| <b>PAPILIONIDAE</b>                                        |   |   |      |      |          |      |  |
| <i>Papilio machaon</i> Linnaeus, 1758                      | 3 | 1 | 0.59 | 0.88 | MW305954 | 100  |  |
|                                                            |   | 1 |      |      | MW305955 | 100  |  |
|                                                            |   | 2 |      |      | MW305956 | 100  |  |
| <b>PIERIDAE</b>                                            |   |   |      |      |          |      |  |
| <i>Colias croceus</i> (Fourcroy, 1785)                     | 2 | 1 | 0.00 | 0.00 | MW305833 | 100  |  |
|                                                            |   | 1 |      |      | MW305834 | 100  |  |
| <i>Pieris brassicae</i> (Linnaeus, 1758)                   | 1 | 1 | -    | -    | KX399362 | 99.6 |  |
| <i>Pieris rapae</i> (Linnaeus, 1758)                       | 1 | 1 | -    | -    | KX399357 | 99.8 |  |
| <b>PLUTELLIDAE</b>                                         |   |   |      |      |          |      |  |
| <i>Plutella xylostella</i> (Linnaeus, 1758)                | 3 | 1 | 0.50 | 0.76 | MF059242 | 100  |  |
|                                                            |   | 2 |      |      | MW305984 | 99.9 |  |
|                                                            |   | 3 |      |      | MW305985 | 100  |  |
| <b>PSYCHIDAE</b>                                           |   |   |      |      |          |      |  |
| <i>Oiketicooides lutea</i> (Staudinger, 1870) <sup>F</sup> | 4 | 1 | 0.38 | 0.66 | KX399366 | 98.4 |  |
|                                                            |   | 1 |      |      | KX399372 | 98.4 |  |
|                                                            |   | 2 |      |      | MW305948 | 98.9 |  |
|                                                            |   | 3 |      |      | MW305949 | 99.2 |  |
| <i>Penestoglossa dardoinella</i> (Milliere, 1863)          | 3 | 1 | 0.00 | 0.00 | MW305958 | 98.8 |  |
|                                                            |   | 1 |      |      | MW305959 | 98.8 |  |
|                                                            |   | 1 |      |      | MW305960 | 98.8 |  |
| <b>PTEROPHORIDAE</b>                                       |   |   |      |      |          |      |  |
| <i>Agdistis frankeniae</i> (Zeller, 1847)                  | 1 | 1 | -    | -    | MF059241 | 96.5 |  |
| <i>Emmelina monodactyla</i> (Linnaeus, 1758)               | 2 | 1 | 0.00 | 0.00 | KX399378 | 100  |  |
|                                                            |   | 1 |      |      | MW305849 | 100  |  |
| <i>Merrifieldia malacodactylus</i> (Zeller, 1847)          | 1 | 1 | -    | -    | MW305932 | 100  |  |
| <b>Pterophoridae sp.</b>                                   | 1 | 1 | -    | -    | MW305997 | 92.7 |  |
| <i>Stenoptilia</i> sp.                                     | 1 | 1 | -    | -    | MW306016 | 99.9 |  |
| <b>PYRALIDAE</b>                                           |   |   |      |      |          |      |  |
| <i>Aglossa caprealis</i> (Hübner, 1809)                    | 1 | 1 | -    | -    | MF059243 | 98.5 |  |
| <i>Apomyelois ceratoniae</i> (Zeller, 1839)                | 2 | 1 | 0.72 | 0.72 | MW305785 | 100  |  |
|                                                            |   | 2 |      |      | MW305786 | 100  |  |
| <i>Bostra dipectinialis</i> Hampson, 1906 <sup>F</sup>     | 7 | 1 | 0.00 | 0.00 | MW305796 | 100  |  |
|                                                            |   | 1 |      |      | MW305797 | 100  |  |
|                                                            |   | 1 |      |      | MW305798 | 100  |  |
|                                                            |   | 1 |      |      | MW305799 | 100  |  |
|                                                            |   | 1 |      |      | MW305800 | 100  |  |
|                                                            |   | 1 |      |      | MW305801 | 100  |  |
|                                                            |   | 1 |      |      | MW305802 | 100  |  |
| <i>Cadra abstersella</i> (Zeller, 1847)                    | 7 | 1 | 0.00 | 0.00 | KX399355 | 100  |  |
|                                                            |   | 1 |      |      | MF059245 | 100  |  |
|                                                            |   | 1 |      |      | MF059246 | 100  |  |
|                                                            |   | 1 |      |      | MW305804 | 100  |  |
|                                                            |   | 1 |      |      | MW305805 | 100  |  |
|                                                            |   | 1 |      |      | MW305806 | 100  |  |
|                                                            |   | 1 |      |      | MW305807 | 100  |  |
| <i>Cadra cautella</i> (Walker, 1863)                       | 2 | 1 | 0.44 | 0.44 | KX399347 | 99.8 |  |
|                                                            |   | 2 |      |      | MW305808 | 100  |  |
| <i>Cadra figulilella</i> (Gregson, 1871)                   | 6 | 1 | 0.18 | 0.44 | KX399381 | 100  |  |
|                                                            |   | 1 |      |      | MF059247 | 100  |  |
|                                                            |   | 1 |      |      | MF059248 | 100  |  |
|                                                            |   | 2 |      |      | MF059249 | 100  |  |
|                                                            |   | 2 |      |      | MW305809 | 100  |  |

|                                                              |    |   |      |      |          |      |
|--------------------------------------------------------------|----|---|------|------|----------|------|
|                                                              |    | 1 |      |      | MW305810 | 100  |
| <i>Ceutholopha isidis</i> (Zeller, 1867)                     | 2  | 1 | 0.56 | 0.56 | KX399356 | 99.6 |
|                                                              |    | 2 |      |      | MW305822 | 100  |
| <i>Ephestia elutella</i> (Hübner, 1796)                      | 1  | 1 | -    | -    | MW305850 | 100  |
| <i>Lamoria anella</i> (Denis & Schiffermuller, 1775)         | 11 | 1 | 0.41 | 1.83 | KX399348 | 98.9 |
|                                                              |    | 1 |      |      | MF059234 | 98.9 |
|                                                              |    | 1 |      |      | MF059235 | 98.9 |
|                                                              |    | 1 |      |      | MF059236 | 98.9 |
|                                                              |    | 1 |      |      | MF059237 | 98.9 |
|                                                              |    | 1 |      |      | MF059238 | 98.9 |
|                                                              |    | 2 |      |      | MF059239 | 98.6 |
|                                                              |    | 2 |      |      | MF059240 | 98.6 |
|                                                              |    | 3 |      |      | MW305912 | 99.8 |
|                                                              |    | 1 |      |      | MW305913 | 98.6 |
|                                                              |    | 2 |      |      | MW305914 | 98.9 |
| <i>Oxybia transversella</i> (Duponchel, 1836)                | 1  | 1 | -    | -    | MF059261 | 99.4 |
| <i>Phycita diaphana</i> (Staudinger, 1870)                   | 1  | 1 | -    | -    | MW305973 | 99.9 |
| <i>Phycitodes saxicola</i> (Vaughan, 1870)                   | 2  | 1 | 0.00 | 0.00 | MW305974 | 98.9 |
|                                                              |    | 1 |      |      | MW305975 | 98.9 |
| <i>Plodia interpunctella</i> (Hübner, 1813)                  | 2  | 1 | 0.00 | 0.00 | MW305982 | 100  |
|                                                              |    | 1 |      |      | MW305983 | 100  |
| <i>Psorosa dahliella</i> (Treitschke, 1832)                  | 1  | 1 | -    | -    | MW305996 | 100  |
| <i>Pyrallis farinalis</i> (Linnaeus, 1758)                   | 2  | 1 | 0.16 | 0.16 | MF059233 | 99.8 |
|                                                              |    | 2 |      |      | MW305999 | 99.8 |
| <i>Stemmatophora brunnealis</i> (Treitschke, 1829)           | 3  | 1 | 0.21 | 0.35 | MW306013 | 100  |
|                                                              |    | 1 |      |      | MW306014 | 100  |
|                                                              |    | 2 |      |      | MW306015 | 99.7 |
| <b>SESIIDAE</b>                                              |    |   |      |      |          |      |
| <i>Bembecia albanensis</i> (Rebel, 1918)                     | 1  | 1 | -    |      | KX399365 | 99.1 |
| <b>SPHINGIDAE</b>                                            |    |   |      |      |          |      |
| <i>Acherontia atropos</i> (Linnaeus, 1758)                   | 1  | 1 | -    | -    | MW305743 | 100  |
| <i>Agrius convolvuli</i> (Linnaeus, 1758)                    | 1  | 1 | -    | -    | MW305752 | 100  |
| <i>Hippotion celerio</i> (Linnaeus, 1758)                    | 2  | 1 | 0.00 | 0.00 | MW305891 | 100  |
|                                                              |    | 1 |      |      | MW305892 | 100  |
| <b>TINEIDAE</b>                                              |    |   |      |      |          |      |
| <i>Niditinea fuscella</i> (Linnaeus, 1758)                   | 1  | 1 | -    | -    | MW305939 | 99.1 |
| <i>Phereoeca praecox</i> (Gozmany & Vari, 1973) <sup>F</sup> | 3  | 1 | 0.32 | 0.44 | MW305963 | 100  |
|                                                              |    | 2 |      |      | MW305964 | 99.9 |
|                                                              |    | 3 |      |      | MW305965 | 99.8 |
| <i>Tinea murariella</i> Staudinger, 1859                     | 1  | 1 | -    | -    | MW306020 | 100  |
| <b>TORTRICIDAE</b>                                           |    |   |      |      |          |      |
| <i>Aethes</i> sp.                                            | 3  | 1 | 0.56 | 1.30 | MW305746 | 96.5 |
|                                                              |    | 2 |      |      | MW305747 | 96.6 |
|                                                              |    | 1 |      |      | MW305748 | 96.5 |
| <i>Cacoecimorpha pronubana</i> (Hübner, 1799)                | 2  | 1 | 0.00 | 0.00 | MF059255 | 99.5 |
|                                                              |    | 1 |      |      | MW305803 | 99.5 |
| <i>Clepsis</i> sp.                                           | 2  | 1 | 0.50 | 0.50 | MW305830 | 96.7 |
|                                                              |    | 2 |      |      | MF059254 | 96.7 |
| <i>Eucosma</i> sp.                                           | 4  | 1 | 0.00 | 0.00 | KX399358 | 100  |
|                                                              |    | 1 |      |      | KX399360 | 100  |
|                                                              |    | 1 |      |      | KX399361 | 100  |
|                                                              |    | 1 |      |      | MW305870 | 100  |
| <i>Lobesia botrana</i> (Denis & Schiffermuller, 1775)        | 2  | 1 | 0.22 | 0.22 | KX399371 | 99.8 |
|                                                              |    | 2 |      |      | MF059256 | 100  |
| <i>Pseudococcyx tessulatana</i> (Staudinger, 1871)           | 1  | 1 | -    | -    | MW305990 | 100  |
| <i>Selania capparidana</i> (Zeller, 1847)                    | 1  | 1 | -    | -    | MW306003 | 97.7 |
